# Supplementary material for: Origin of strong red emission in Er3+-based upconversion materials: role of intermediate states and cross relaxation
Source: Royal Society of Chemistry journal article supplement (doi:10.1039/c9cp04692e), 2019-01-01
Supplement: c9cp04692e1.pdf [file c9cp04692e1.pdf]

Electronic Supplementary Information for

Origin of strong red emission in  $\text{Er}^{3+}$ -based  
upconversion materials: Role of intermediate  
states and cross relaxation

*Chiho Lee<sup>1‡</sup>, Heeyeon Park<sup>2‡</sup>, Woong Kim<sup>2\*</sup>, and Sungnam Park<sup>1,3\*</sup>*

<sup>1</sup>Department of Chemistry and Research Institute for Natural Sciences, Korea University, 145 Anam-ro, Seongbuk-gu, Seoul 02841, Republic of Korea

<sup>2</sup>Department of Materials Science and Engineering, Korea University, 145 Anam-ro, Seongbuk-gu, Seoul 02841, Republic of Korea

<sup>3</sup>Green School, Korea University, 145 Anam-ro, Seongbuk-gu, Seoul 02841, Republic of Korea

\*Authors to whom correspondence should be addressed.

Email addresses: woongkim@korea.ac.kr & spark8@korea.ac.kr

‡ These authors contributed equally to this work

**Figure S1.**

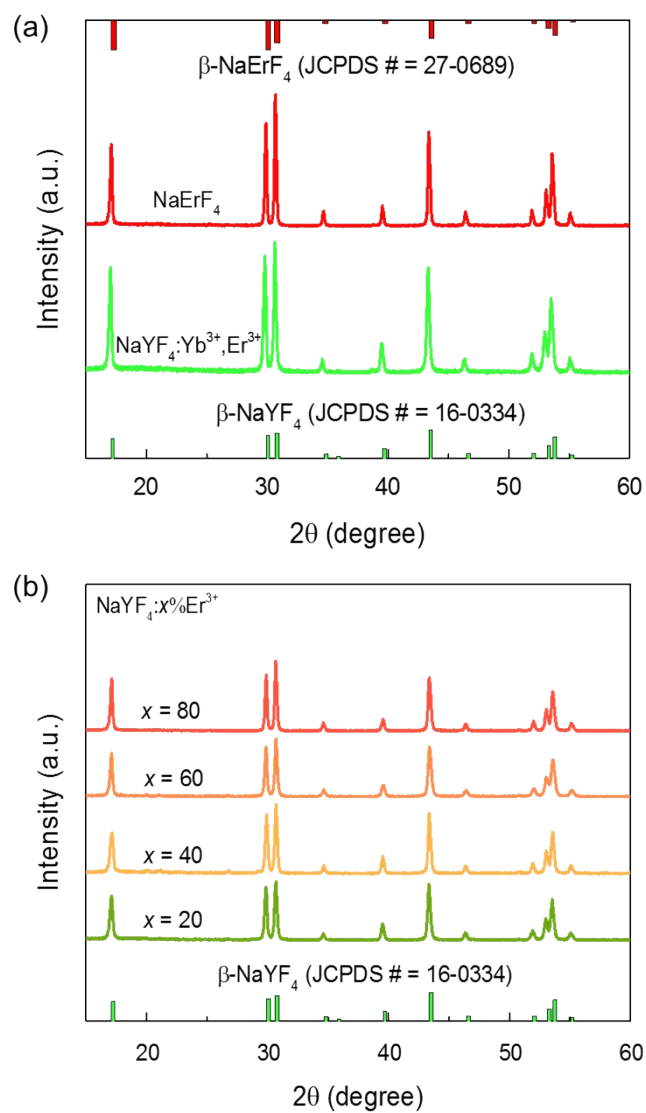

**Figure S1.** XRD patterns of (a)  $\text{NaErF}_4$ ,  $\text{NaYF}_4:\text{Yb}^{3+},\text{Er}^{3+}$  ( $\text{Y}^{3+}:\text{Yb}^{3+}:\text{Er}^{3+}=78:20:2$ ), and (b)  $\text{NaYF}_4:x\%\text{Er}^{3+}$  ( $x=20\sim 80$ ) powders.

**Figure S2.**

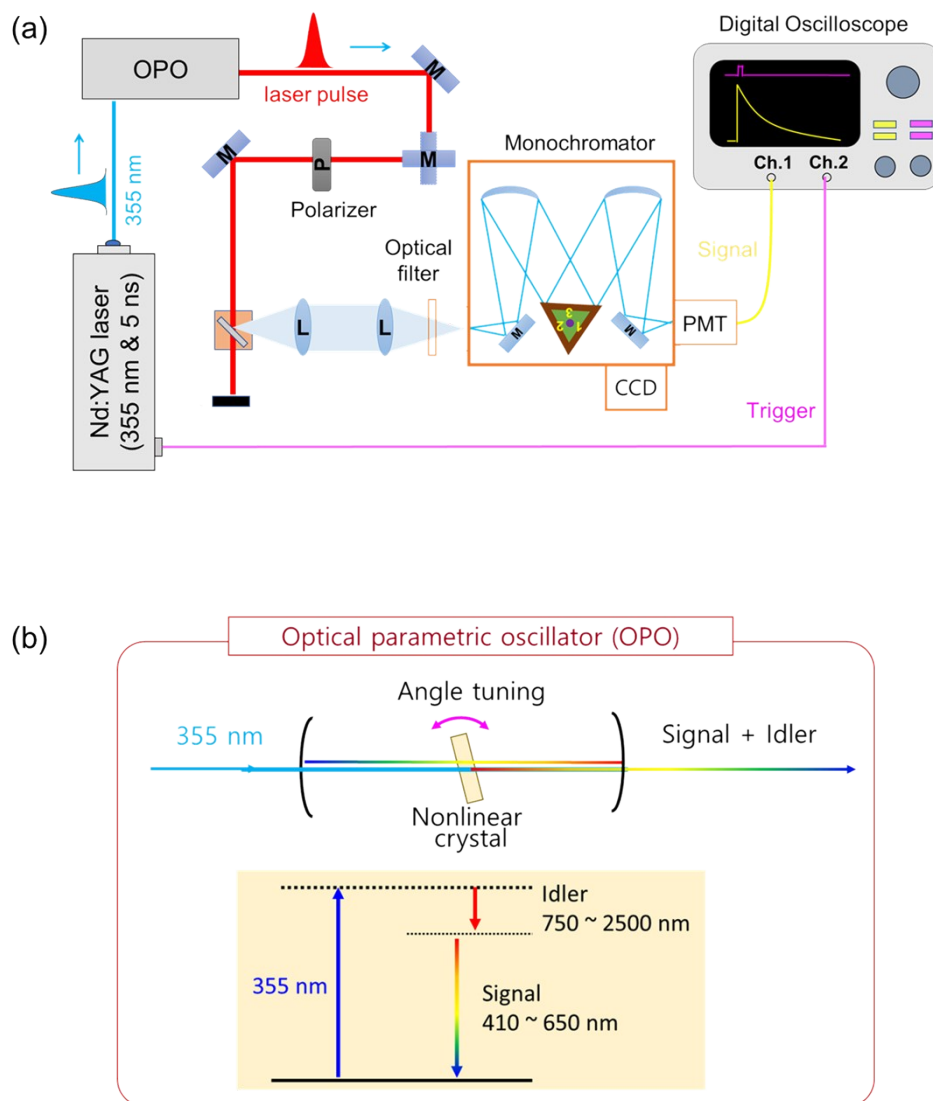

**Figure S2. (a)** Nanosecond time-resolved PL experimental setup. **(b)** Schematic illustration of an optical parametric oscillator (OPO) and nonlinear optical processes.

**Figure S3.**

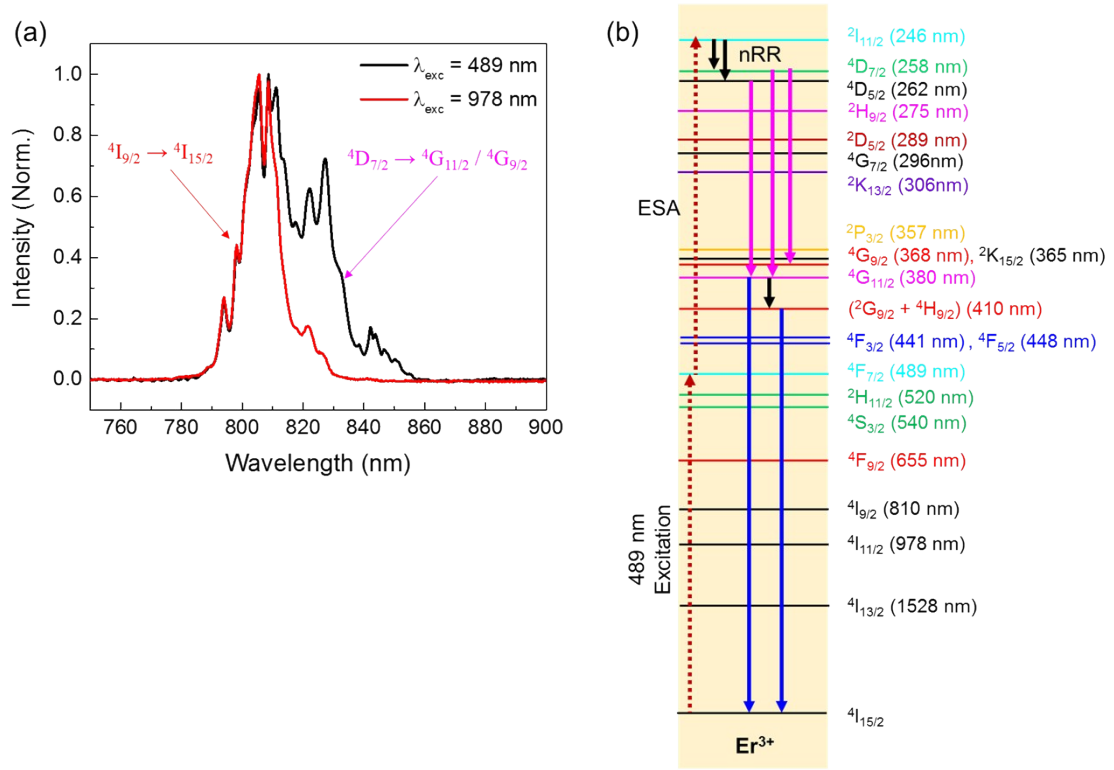

**Figure S3.** (a) PL spectra measured with  $\text{NaErF}_4$  powders ( $\lambda_{\text{exc}} = 489$  and  $978 \text{ nm}$ ). The excitation laser power is  $20 \text{ mW}$ . (b) The energy level diagram of  $\text{Er}^{3+}$ . The marginal arrows indicate that the radiative relaxation from higher electronic states ( $^2I_{11/2}$ ,  $^2D_{7/2}$  and  $^2D_{5/2}$  states) to  $^2G_{11/2}$  and  $^2G_{9/2}$  states. The non-radiative relaxations (nRR) are indicated by the black arrows.

**Figure S4.**

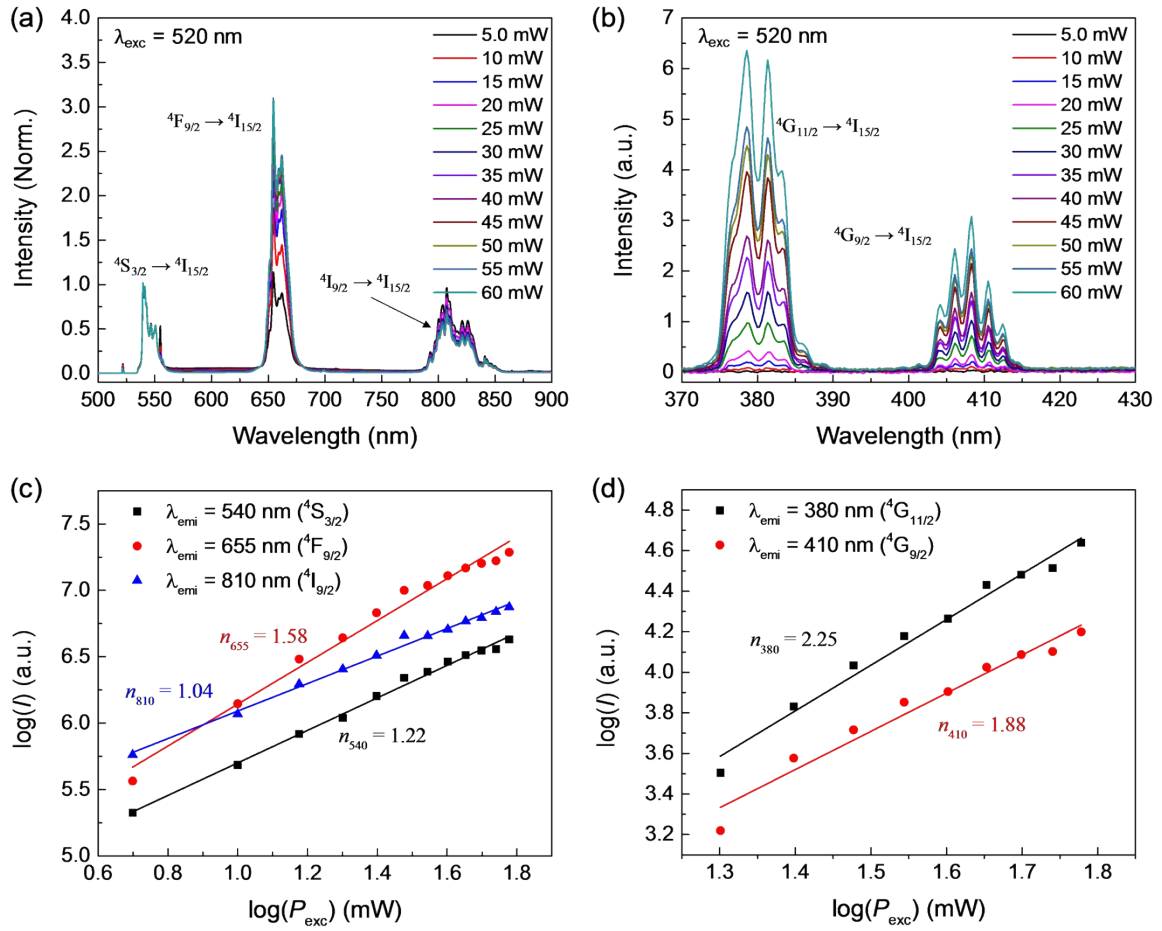

**Figure S4.** (a) Power-dependent PL spectra measured with NaErF<sub>4</sub> powders ( $\lambda_{\text{exc}} = 520$  nm). A 532 nm Raman edge filter was used to block the Rayleigh scattering. The emission at ~520 nm is not shown. All PL spectra were normalized based on the peak at ~540 nm ( $^4\text{S}_{3/2} \rightarrow ^4\text{I}_{15/2}$ ) for comparison. (b) Power-dependent emission peaks at ~380 and ~410 nm. (c) and (d) The log-log plot of the emission intensities ( $I$ ) against excitation laser power ( $P_{\text{exc}}$ ). Data points are experimental results and the line is the fit to Eq. (1). The slopes ( $n$ ) are given.

**Figure S5.**

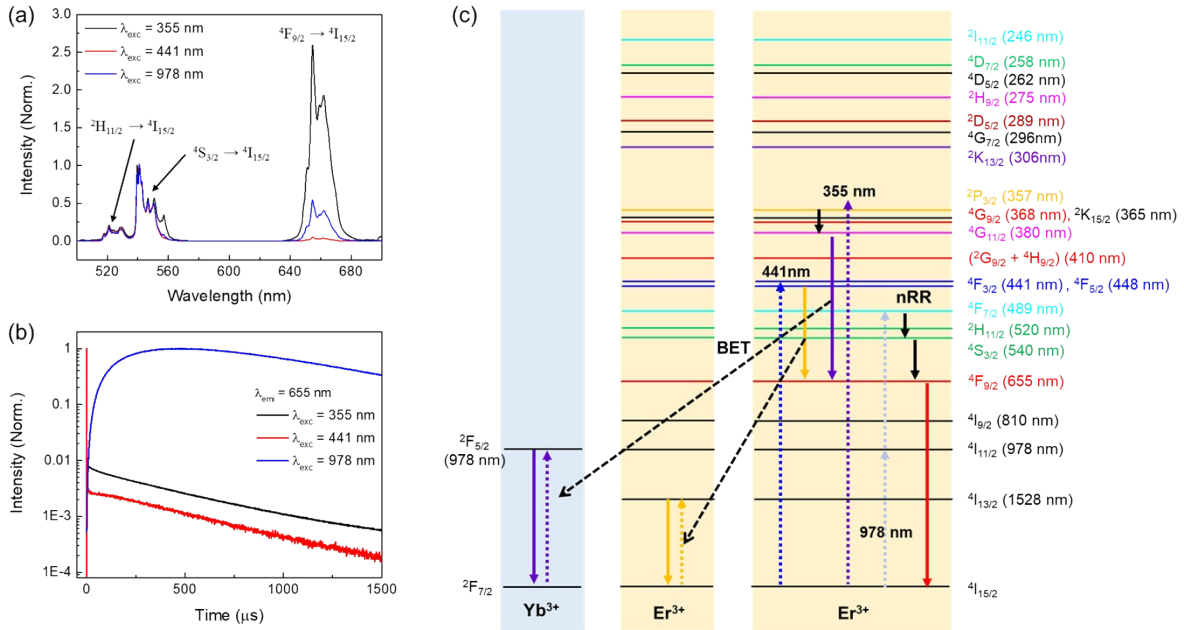

**Figure S5.** (a) PL spectra and (b) time resolved PL signals measured with NaYF<sub>4</sub>:Yb<sup>3+</sup>:Er<sup>3+</sup> (Y<sup>3+</sup>:Yb<sup>3+</sup>:Er<sup>3+</sup>=78:20:2) powders ( $\lambda_{exc}$  = 355, 441, and 978 nm). PL spectra are normalized based on the peak at ~540 nm. The excitation laser power is set to 20 mW. (c) The energy level diagram and the possible transitions. The resonance energy transfers are indicated by the dashed arrows.

**Figure S6.**

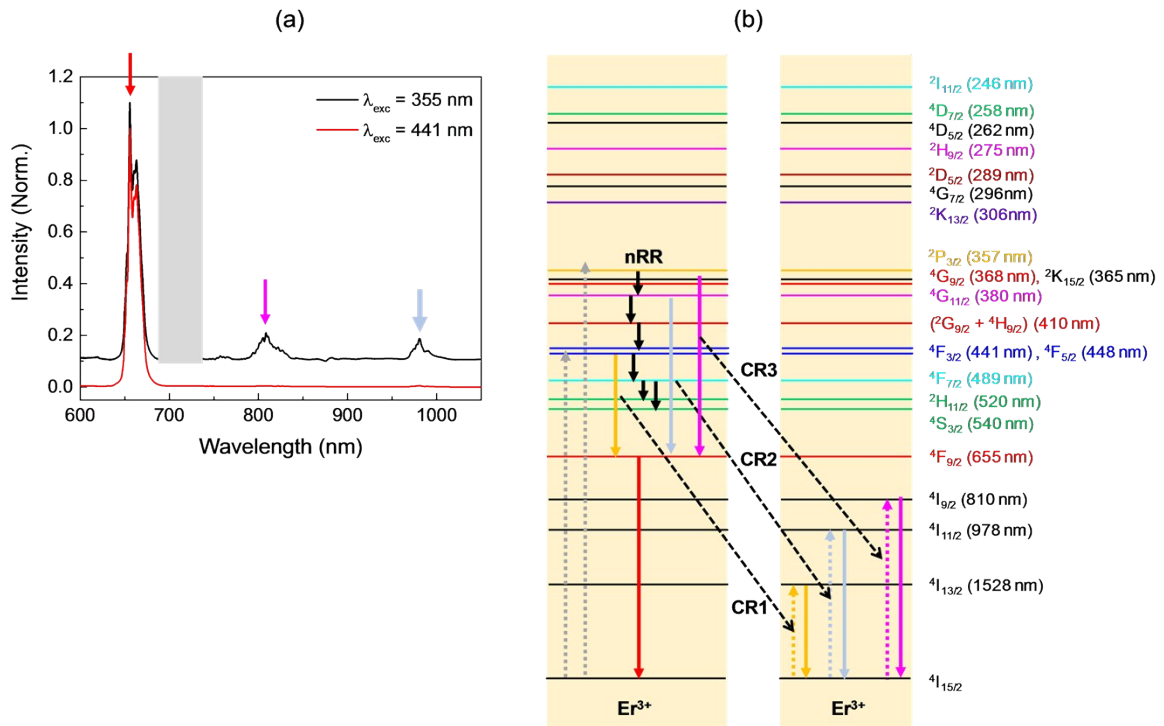

**Figure S6. (a)** PL spectra measured with NaErF<sub>4</sub> powders ( $\lambda_{\text{exc}} = 355$  and 441 nm). PL spectra are normalized based on the peak at 655 nm for comparison. The sub-harmonic of 355 nm was deleted from the PL spectrum. The excitation laser power is set to 20 mW. **(b)** The energy level diagram of Er<sup>3+</sup>. The peaks at ~810 and 978 nm result from the cross relaxation as indicated by the dashed arrows. The cross relaxation between neighboring Er<sup>3+</sup> ions are very efficient in NaErF<sub>4</sub> powders.

**Figure S7.**

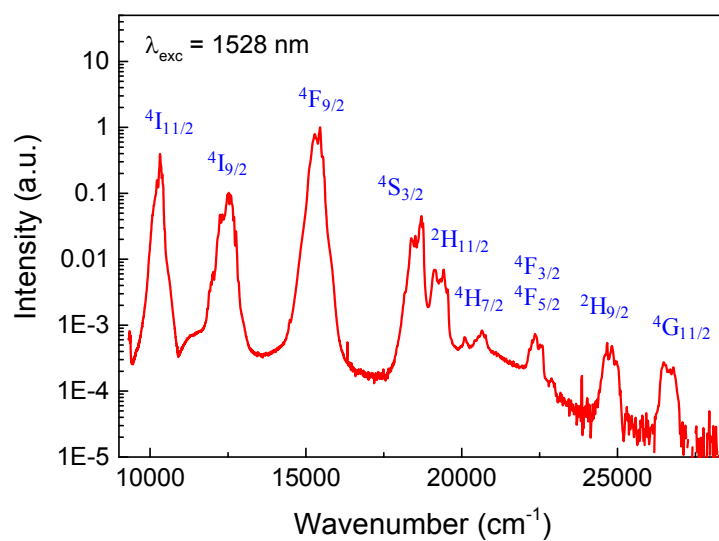

**Figure S7.** PL spectrum measured with NaErF<sub>4</sub> powder ( $\lambda_{\text{exc}} = 1528$  nm). The electronic states are assigned to all the peaks.

**Table S1.** Particle sizes of Er<sup>3+</sup>-based upconversion materials

| UC material                                                             | Particle size (nm) <sup>a</sup> |
|-------------------------------------------------------------------------|---------------------------------|
| NaErF <sub>4</sub>                                                      | 44.8                            |
| NaYF <sub>4</sub> :Er <sup>3+</sup> (80%)                               | 40.1                            |
| NaYF <sub>4</sub> :Er <sup>3+</sup> (60%)                               | 34.8                            |
| NaYF <sub>4</sub> :Er <sup>3+</sup> (40%)                               | 34.7                            |
| NaYF <sub>4</sub> :Er <sup>3+</sup> (20%)                               | 32.1                            |
| NaYF <sub>4</sub> :Yb <sup>3+</sup> , Er <sup>3+</sup> (78% : 20% : 2%) | 37.6                            |

<sup>a</sup> Particle sizes were estimated from the XRD data and the Scherrer equation.
